# Supplementary material for: Comparative effectiveness of exercise, antidepressants and their combination in treating non-severe depression: a systematic review and network meta-analysis of randomised controlled trials
Source: PubMed Central journal article supplement — Br J Sports Med. 2022 Sep 16;56(23):1375–80. doi: 10.1136/bjsports-2022-105964 (PMC9685718; doi:10.1136/bjsports-2022-105964), 2022-09-16
Supplement: bjsports-2022-105964supp001.pdf [file bjsports-2022-105964supp001.pdf]

**Comparative effectiveness of exercise, antidepressants, and their combination  
in treating non-severe depression: A systematic review and network meta-  
analysis of randomized controlled trials**

**Supplementary Online Content**

- eFigure 1.** PRISMA flow chart
- eFigure 2.** Risk of bias contributions
- eFigure 3.** Indirectness contributions
- eTable 1.** Distribution of study characteristics
- eTable 2.** Meta-regression for direct comparisons
- eTable 3.** Risk of bias for all studies
- eTable 4.** Indirectness for all studies
- eTable 5.** Confidence in Network Meta-analysis (CINeMA) final report
- eTable 6.** Treatment ranking based on the P-score
- eTable 7.** Assessment of inconsistency within comparisons
- eTable 8.** Sensitivity analyses
- eAppendix 1.** Search strategy
- eAppendix 2.** Additional methodology information
- eAppendix 3.** Pairwise meta-analyses
- eAppendix 4.** References

eFigure 1. PRISMA flow chart

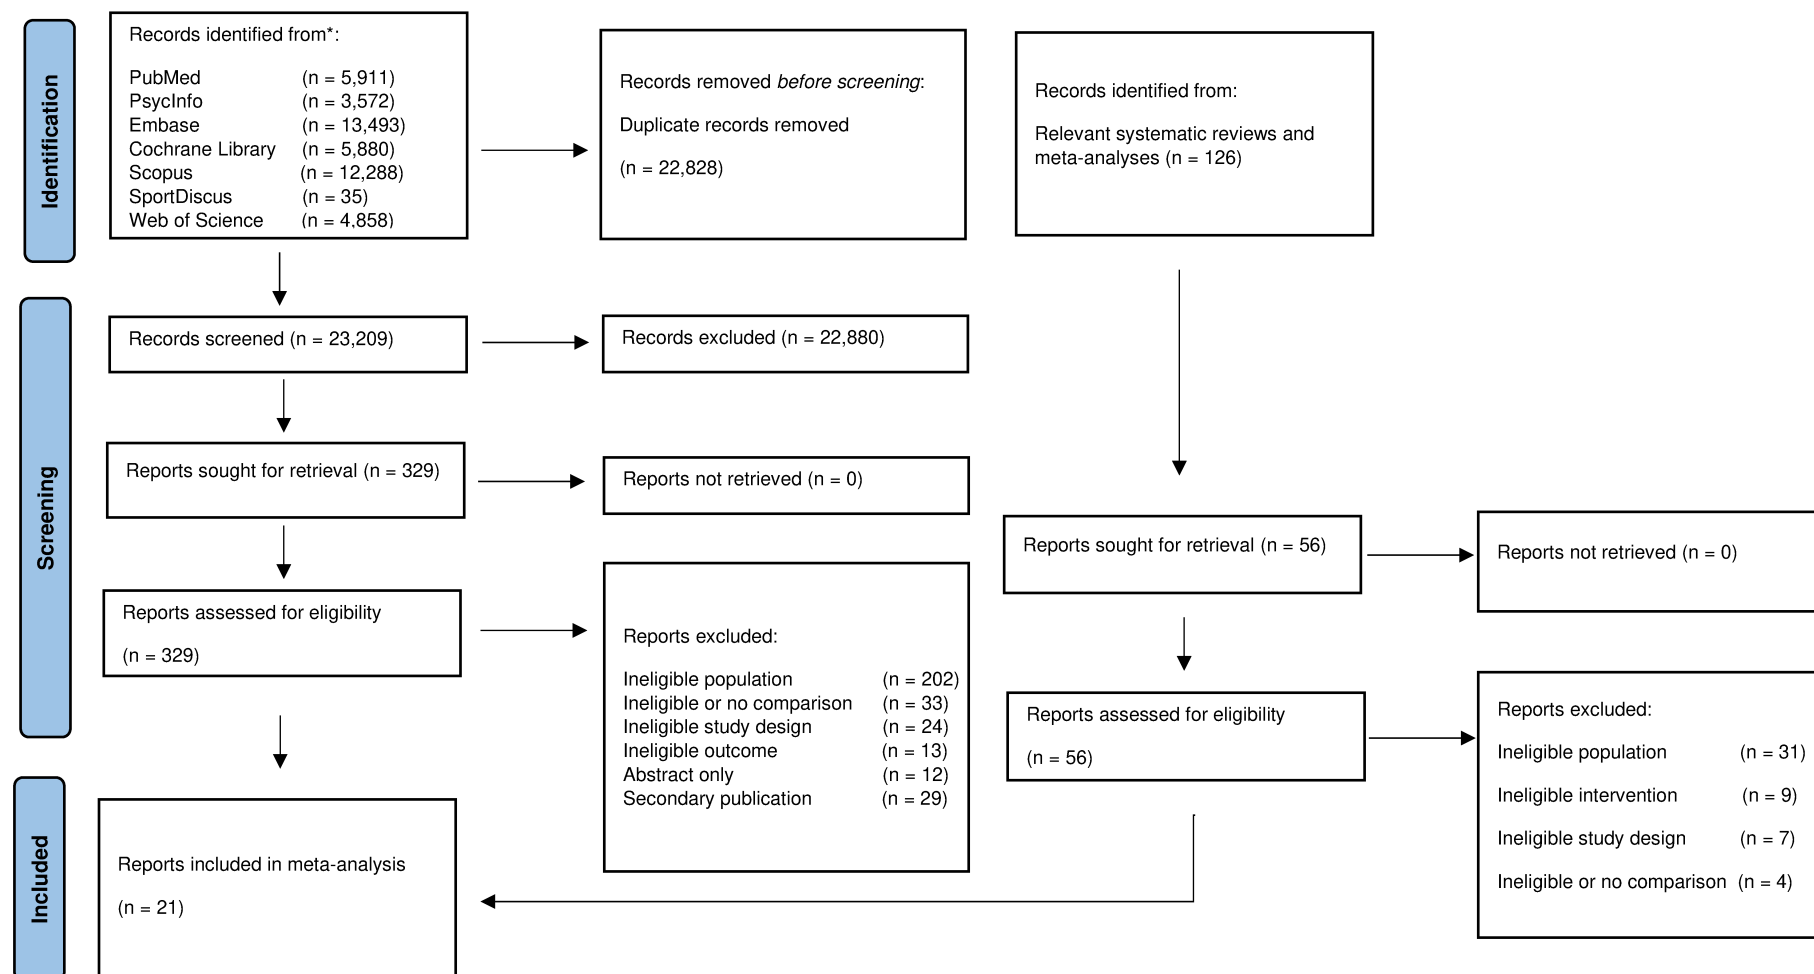

**eFigure 2.** Risk of bias contributions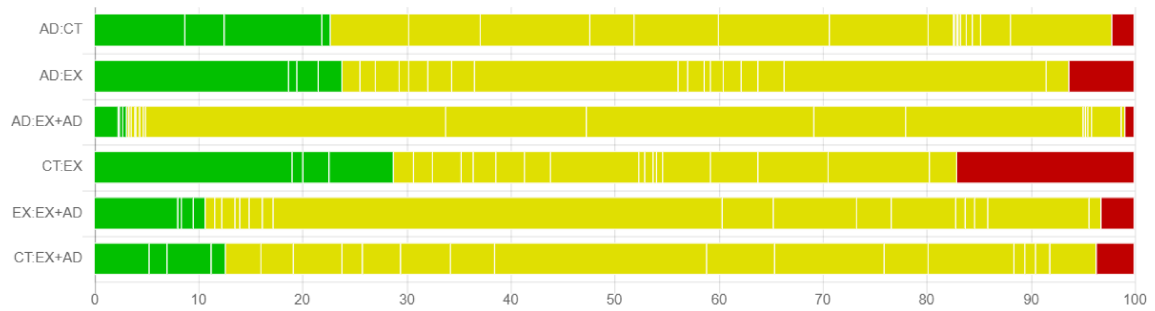

**eFigure 3.** Indirectness contributions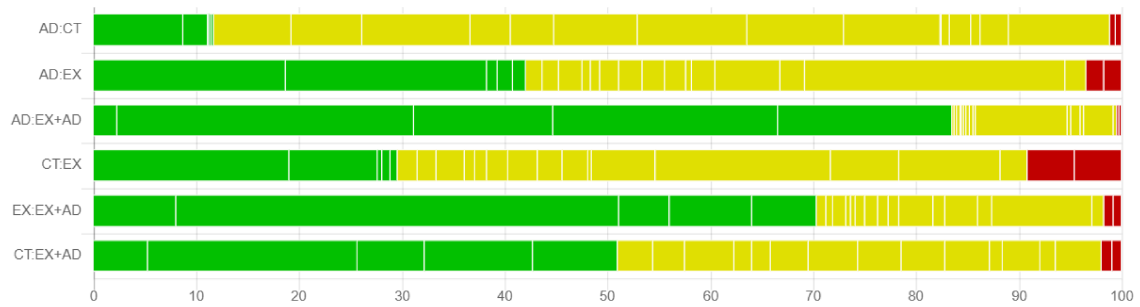

**eTable 1.** Distribution of study characteristics

| <b>Comparison</b> | <b>N studies</b> | <b>Participant age (years)</b> | <b>Sex (% women)</b> | <b>Intervention duration (weeks)</b> | <b>Outcome measure</b> |
|-------------------|------------------|--------------------------------|----------------------|--------------------------------------|------------------------|
| EX:AD             | 3                | < 60                           | ≥ 50%                | 19                                   | HAM-D                  |
| AD:CT             | 11               | < 60                           | ≥ 50%                | 9                                    | HAM-D                  |
| EX:CT             | 6                | < 60                           | ≥ 50%                | 10                                   | HAM-D                  |
| EX+AD:AD          | 4                | < 60                           | ≥ 50%                | 11                                   | HAM-D                  |
| EX+AD:EX          | 1                | < 60                           | ≥ 50%                | 16                                   | HAM-D                  |

**eTable 2.** Meta-regression for direct comparisons

| Comparison <sup>a</sup>        | N  | Coefficient [95% CI]  | SE   | P value |
|--------------------------------|----|-----------------------|------|---------|
| <b>EX:AD</b>                   | 3  |                       |      |         |
| - Mean age                     |    | -0.00 [-0.16 to 0.16] | 0.01 | 0.94    |
| - Mean duration                |    | -0.01 [-0.21 to 0.20] | 0.02 | 0.75    |
| - Proportion of women          |    | -0.02 [-0.39 to 0.36] | 0.03 | 0.67    |
| - Outcome measure              |    | -0.05 [-1.68 to 1.58] | 0.13 | 0.75    |
| <b>AD:CT</b>                   | 11 |                       |      |         |
| - Mean age                     |    | 0.01 [-0.03 to 0.05]  | 0.02 | 0.70    |
| - Mean duration                |    | 0.02 [-0.03 to 0.08]  | 0.02 | 0.35    |
| - Proportion of women          |    | -0.01 [-0.03 to 0.01] | 0.01 | 0.40    |
| - Outcome measure <sup>b</sup> |    | NA                    | NA   | NA      |
| <b>EX:CT</b>                   | 6  |                       |      |         |
| - Mean age                     |    | 0.03 [-0.03 to 0.08]  | 0.02 | 0.20    |
| - Mean duration                |    | 0.08 [-0.08 to 0.25]  | 0.06 | 0.22    |
| - Proportion of women          |    | 0.00 [-0.04 to 0.04]  | 0.01 | 0.92    |
| - Outcome measure              |    | 0.63 [-0.48 to 1.74]  | 0.40 | 0.19    |
| <b>EX+AD:AD</b>                | 4  |                       |      |         |
| - Mean age                     |    | 0.01 [-0.06 to 0.09]  | 0.02 | 0.54    |
| - Mean duration                |    | 0.04 [-0.09 to 0.18]  | 0.03 | 0.28    |
| - Proportion of women          |    | -0.05 [-0.36 to 0.27] | 0.07 | 0.58    |
| - Outcome measure              |    | -0.49 [-2.03 to 1.06] | 0.36 | 0.31    |

<sup>a</sup>Meta-regression for the EX+AD:EX comparison could not be performed because only one study was available for that comparison

<sup>b</sup>Meta-regression for this categorical outcome could not be performed because all studies within this comparison used the same outcome measure

**eTable 3.** Risk of bias for all studies

| Study                     | Randomization process | Deviations from intended interventions | Missing outcome data | Measurement of the outcome | Selection of the reported result | RoB           |
|---------------------------|-----------------------|----------------------------------------|----------------------|----------------------------|----------------------------------|---------------|
| Bjerkenstedt et al., 2004 | Low                   | Low                                    | Low                  | Low                        | Some concerns                    | Some concerns |
| Blumenthal et al., 1999   | Some concerns         | Low                                    | Low                  | Some concerns              | Some concerns                    | Some concerns |
| Blumenthal et al., 2007   | Low                   | Low                                    | Low                  | Low                        | Low                              | Low           |
| Danielsson et al., 2014   | Low                   | Low                                    | Low                  | Low                        | Some concerns                    | Some concerns |
| Detke et al., 2002        | Some concerns         | Low                                    | Low                  | Low                        | Low                              | Some concerns |
| Detke et al., 2004        | Some concerns         | Low                                    | Low                  | Low                        | Low                              | Some concerns |
| Dunn et al., 2005         | Low                   | Low                                    | Low                  | Low                        | Low                              | Low           |
| Fava et al., 2005         | Some concerns         | Low                                    | Low                  | Low                        | Some concerns                    | Some concerns |
| Gastpar et al., 2005      | Some concerns         | Low                                    | Low                  | Low                        | Some concerns                    | Some concerns |
| Goldstein et al., 2004    | Low                   | Low                                    | Low                  | Low                        | Low                              | Low           |
| Hemat-Far et al., 2012    | Some concerns         | Some concerns                          | Low                  | Some concerns              | Some concerns                    | Some concerns |
| Hidalgo et al., 2021      | Some concerns         | Low                                    | Low                  | Some concerns              | Low                              | Some concerns |
| Krogh et al., 2012        | Some concerns         | High                                   | Low                  | Low                        | Low                              | High          |
| Mao et al., 2015          | Low                   | Low                                    | Low                  | Low                        | Low                              | Low           |
| Mather et al., 2002       | Low                   | Some concerns                          | Low                  | Low                        | Some concerns                    | Some concerns |
| McNeil et al., 1991       | Some concerns         | Some concerns                          | Low                  | Some concerns              | Some concerns                    | Some concerns |
| Moreno et al., 2005       | Low                   | Low                                    | Low                  | Low                        | Low                              | Low           |
| Perahia et al., 2006      | Some concerns         | Low                                    | Low                  | Low                        | Low                              | Some concerns |
| Philipp et al., 1999      | Some concerns         | Low                                    | Low                  | Low                        | Some concerns                    | Some concerns |
| Sadeghi et al., 2016      | Some concerns         | Low                                    | Some concerns        | Low                        | Low                              | Some concerns |
| Siqueira et al., 2016     | Some concerns         | Low                                    | Low                  | Low                        | Low                              | Some concerns |

**eTable 4.** Indirectness for all studies

| Author                    | Population |                 | Intervention |                    | Outcome  |                             | Comparisons | Indirectness |
|---------------------------|------------|-----------------|--------------|--------------------|----------|-----------------------------|-------------|--------------|
| Bjerkenstedt et al., 2005 | Low        |                 | Low          |                    | Low      |                             | High        | Moderate     |
| Blumenthal et al., 1999   | Low        |                 | Low          |                    | Low      |                             | Low         | Low          |
| Blumenthal et al., 2007   | Low        |                 | Low          |                    | Low      |                             | Low         | Low          |
| Danielsson et al., 2014   | Low        |                 | Low          |                    | Low      |                             | Low         | Low          |
| Detke et al., 2002        | Low        |                 | Low          |                    | Low      |                             | High        | Moderate     |
| Detke et al., 2004        | Low        |                 | Low          |                    | Low      |                             | High        | Moderate     |
| Dunn et al., 2005         | Low        |                 | Low          |                    | Low      |                             | High        | Moderate     |
| Fava et al., 2005         | Low        |                 | Low          |                    | Low      |                             | High        | Moderate     |
| Gastpar et al., 2006      | Low        |                 | Low          |                    | Low      |                             | High        | Moderate     |
| Goldstein et al., 2004    | Low        |                 | Low          |                    | Low      |                             | High        | Moderate     |
| Hemat-Far et al., 2012    | High       | Female students | Low          |                    | Moderate | Self-reported questionnaire | High        | High         |
| Hidalgo et al. 2021       | High       | Elderly         | Low          |                    | Low      |                             | Low         | Moderate     |
| Krogh et al., 2012        | Low        |                 | Low          |                    | Low      |                             | High        | Moderate     |
| Mao et al., 2015          | Low        |                 | Low          |                    | Low      |                             | High        | Moderate     |
| Mather et al., 2002       | Low        |                 | Low          |                    | Low      |                             | Low         | Low          |
| McNeil et al., 1991       | High       | Elderly         | Moderate     | Somewhat different | Moderate | Self-reported questionnaire | High        | High         |
| Moreno et al., 2006       | Low        |                 | Low          |                    | Low      |                             | High        | Moderate     |
| Perahia et al., 2006      | Low        |                 | Low          |                    | Low      |                             | High        | Moderate     |
| Philipp et al., 1999      | Low        |                 | Low          |                    | Low      |                             | High        | Moderate     |
| Sadeghi et al., 2016      | Low        |                 | Low          |                    | Moderate | Self-reported questionnaire | High        | Moderate     |
| Siqueira et al., 2016     | Low        |                 | Low          |                    | Low      |                             | Low         | Low          |



**eTable 5.** Confidence in Network Meta-analysis (CINeMA) final report

| Comparison | N  | Within-study bias | Reporting bias | Indirectness  | Imprecision   | Heterogeneity | Incoherence | Confidence rating |
|------------|----|-------------------|----------------|---------------|---------------|---------------|-------------|-------------------|
| AD:CT      | 10 | Some concerns     | Some concerns  | Some concerns | No concerns   | Some concerns | No concerns | Moderate          |
| AD:EX      | 2  | Some concerns     | Some concerns  | Some concerns | Some concerns | No concerns   | No concerns | Moderate          |
| EX+AD:AD   | 5  | Some concerns     | Some concerns  | No concerns   | Some concerns | No concerns   | No concerns | High              |
| EX:CT      | 6  | Some concerns     | Some concerns  | Some concerns | No concerns   | Some concerns | No concerns | Moderate          |
| EX+AD:EX   | 1  | Some concerns     | Some concerns  | No concerns   | Some concerns | Some concerns | No concerns | Moderate          |
| EX+AD:CT   | 0  | Some concerns     | Some concerns  | Some concerns | No concerns   | No concerns   | No concerns | High              |

**eTable 6.** Treatment ranking based on the P-score

| <b>Treatment</b> | <b>P-score</b> |
|------------------|----------------|
| EX               | 0.7865         |
| EX+AD            | 0.7639         |
| AD               | 0.4489         |
| CT               | 0.0008         |

**eTable 7.** Assessment of inconsistency within comparisons

| Comparison | k  | Direct | Indirect | Difference | z     | P-value |
|------------|----|--------|----------|------------|-------|---------|
| AD:CT      | 11 | -0.33  | -0.38    | 0.05       | 0.22  | 0.83    |
| AD:EX      | 3  | 0.07   | 0.19     | -0.12      | -0.52 | 0.60    |
| EX+AD:AD   | 4  | 0.12   | 0.09     | 0.03       | 0.06  | 0.95    |
| EX:CT      | 6  | -0.43  | -0.48    | 0.05       | 0.21  | 0.83    |
| EX+AD:CT   | 0  | NA     | -0.45    | NA         | NA    | NA      |
| EX+AD:EX   | 1  | -0.18  | 0.12     | -0.30      | -0.89 | 0.38    |

AD: Antidepressants; CT: Control; EX: Exercise; NA: Not available

**eTable 8.** Sensitivity analyses

| Reasons for exclusion               | N  | EX-AD              | Comb-AD            | Comb-EX            | Comb-CT              | EX-CT               | AD-CT               | I <sup>2</sup> |
|-------------------------------------|----|--------------------|--------------------|--------------------|----------------------|---------------------|---------------------|----------------|
| All included                        | 21 | -.12 (-.33 to .10) | -.12 (-.40 to .16) | -.00 (-.33 to .33) | -.45 (-.76 to -.14)  | -.45 (-.67 to -.23) | -.33 (-.48 to -.19) | 46.2%          |
| Participants older than 60          | 19 | -.10 (-.37 to .16) | -.12 (-.41 to .17) | -.02 (-.37 to .34) | -.44 (-.76 to -.12)  | -.43 (-.69 to -.17) | -.33 (-.48 to -.18) | 49.0%          |
| High Risk of Bias                   | 20 | -.20 (-.40 to .00) | -.13 (-.38 to .13) | .07 (-.23 to .37)  | -.48 (-.77 to -.20)  | -.56 (-.77 to -.34) | -.36 (-.49 to -.23) | 31.0%          |
| High Indirectness                   | 19 | -.07 (-.29 to .15) | -.11 (-.39 to .17) | -.04 (-.36 to .29) | -.43 (-.74 to -.12)  | -.39 (-.62 to -.16) | -.32 (-.46 to -.18) | 46.9%          |
| Intervention longer than 12 weeks   | 18 | -.18 (-.58 to .21) | -.29 (-.67 to .09) | -.11 (-.65 to .44) | -.63 (-1.05 to -.22) | -.53 (-.88 to -.17) | -.35 (-.52 to -.17) | 52.5%          |
| SD imputed                          | 16 | -.17 (-.42 to .09) | -.14 (-.45 to .18) | -.03 (-.34 to .40) | -.41 (-.78 to -.04)  | -.44 (-.70 to 0.19) | -.28 (-.50 to .05)  | 50.4%          |
| Attention/active control comparison | 17 | -.14 (-.35 to .07) | -.09 (-.39 to .21) | -.05 (-.28 to .38) | -.44 (-.76 to -.11)  | -.48 (-.71 to -.25) | -.34 (-.47 to -.22) | 32.6%          |
| Passive control comparison          | 19 | -.07 (-.29 to .15) | -.11 (-.39 to .17) | -.04 (-.36 to .29) | -.43 (-.74 to -.12)  | -.39 (-.62 to -.16) | -.32 (-.46 to -.18) | 46.9%          |

**eAppendix 1. Search strategy****PubMed**

| Search | Query                                                                                                                                                                                                                                                                                                    |
|--------|----------------------------------------------------------------------------------------------------------------------------------------------------------------------------------------------------------------------------------------------------------------------------------------------------------|
| #1     | Bupropion[MeSH Terms] OR bupropion[Title/Abstract] OR 34911-55-2[EC/RN Number]                                                                                                                                                                                                                           |
| #2     | Citalopram[MeSH Terms] OR citalopram[Title/Abstract] OR 59729-33-8[EC/RN Number]                                                                                                                                                                                                                         |
| #3     | escitalopram[Title/Abstract] OR 128196-01-0[EC/RN Number]                                                                                                                                                                                                                                                |
| #4     | desvenlafaxine[Title/Abstract] OR 386750-22-7[EC/RN Number]                                                                                                                                                                                                                                              |
| #5     | Fluoxetine[MeSH Terms] OR fluoxetine[Title/Abstract] OR 54910-89-3[EC/RN Number]                                                                                                                                                                                                                         |
| #6     | Fluvoxamine[MeSH Terms] OR fluvoxamine[Title/Abstract] OR 54739-18-3[EC/RN Number]                                                                                                                                                                                                                       |
| #7     | Milnacipran[Supplementary Concept] OR milnacipran[Title/Abstract] OR levomilnacipran[Title/Abstract]                                                                                                                                                                                                     |
| #8     | Mirtazapine[Supplementary Concept] OR mirtazapine[Title/Abstract] OR 4685R51V7M[EC/RN Number]                                                                                                                                                                                                            |
| #9     | Nefazodone[Supplementary Concept] OR nefazodone[Title/Abstract]                                                                                                                                                                                                                                          |
| #10    | Paroxetine[MeSH Terms] OR paroxetine[Title/Abstract] OR 61869-08-7[EC/RN Number]                                                                                                                                                                                                                         |
| #11    | Sertraline[MeSH Terms] OR sertraline[Title/Abstract] OR 79617-96-2[EC/RN Number]                                                                                                                                                                                                                         |
| #12    | Trazodone[MeSH Terms] OR trazodone[Title/Abstract] OR 19794-93-5[EC/RN Number]                                                                                                                                                                                                                           |
| #13    | venlafaxine[Title/Abstract] OR 99300-78-4[EC/RN Number]                                                                                                                                                                                                                                                  |
| #14    | vilazodone[Title/Abstract] OR 163521-08-2[EC/RN Number]                                                                                                                                                                                                                                                  |
| #15    | Vortioxetine[Supplementary Concept] OR vortioxetine[Title/Abstract] OR TKS641KOAY[EC/RN Number]                                                                                                                                                                                                          |
| #16    | duloxetine[Title/Abstract] OR 116539-58-3[EC/RN Number]                                                                                                                                                                                                                                                  |
| #17    | Antidepressive Agents, Second Generation[MeSH Terms] OR Antidepressive Agents, Second-Generation[Pharmacological Action] OR antidepress*[Title/Abstract]                                                                                                                                                 |
| #18    | #1 OR #2 OR #3 OR #4 OR #5 OR #6 OR #7 OR #8 OR #9 OR #10 OR #11 OR #12 OR #13 OR #14 OR #15 OR #16 OR #17                                                                                                                                                                                               |
| #19    | Depression, unipolar[MeSH Terms] OR Depressive disorders[MeSH Terms] OR depress*[Title/Abstract]                                                                                                                                                                                                         |
| #20    | Randomized controlled trial[MeSH Terms] OR Random allocation[MeSH Terms] OR (random*[Title/Abstract] AND (control*[Title/Abstract] OR placebo[Title/Abstract]))                                                                                                                                          |
| #21    | #18 AND #19 AND #20                                                                                                                                                                                                                                                                                      |
| #22    | Exercise[MeSH Terms] OR exercise[Title/Abstract] OR "physical activity"[Title/Abstract] OR aerobic[Title/Abstract] OR training[Title/Abstract] OR lift*[Title/Abstract] OR running[Title/Abstract] OR walk*[Title/Abstract] OR jogging[Title/Abstract] OR swim*[Title/Abstract] OR cycl*[Title/Abstract] |
| #23    | #19 AND #20 AND #22                                                                                                                                                                                                                                                                                      |
| #24    | Adults[MeSH Terms] OR adult*[Title/Abstract]                                                                                                                                                                                                                                                             |
| #25    | #21 AND #24                                                                                                                                                                                                                                                                                              |
| #26    | #23 AND #24                                                                                                                                                                                                                                                                                              |
| #27    | #25 OR #26                                                                                                                                                                                                                                                                                               |
| #28    | Filters: Chinese, English, Italian, from 1990 - 3000/12/12                                                                                                                                                                                                                                               |

**PsycInfo**

| Search | Query                                           |
|--------|-------------------------------------------------|
| S1     | SU(bupropion) OR AB(bupropion) OR TI(bupropion) |

|     |                                                                                                                                                                                                                                                                                                                        |
|-----|------------------------------------------------------------------------------------------------------------------------------------------------------------------------------------------------------------------------------------------------------------------------------------------------------------------------|
| S2  | SU(citalopram) OR AB(citalopram) OR TI(citalopram)                                                                                                                                                                                                                                                                     |
| S3  | SU(escitalopram) OR AB(escitalopram) OR TI(escitalopram)                                                                                                                                                                                                                                                               |
| S4  | SU(Desvenlafaxine) OR AB(Desvenlafaxine) OR TI(Desvenlafaxine)                                                                                                                                                                                                                                                         |
| S5  | SU(Fluoxetine) OR AB(Fluoxetine) OR TI(Fluoxetine)                                                                                                                                                                                                                                                                     |
| S6  | SU(Fluvoxamine) OR AB(Fluvoxamine) OR TI(Fluvoxamine)                                                                                                                                                                                                                                                                  |
| S7  | SU(Levomilnacipran) OR AB(Levomilnacipran) OR TI(Levomilnacipran)                                                                                                                                                                                                                                                      |
| S8  | SU(mirtazapine) OR AB(mirtazapine) OR TI(mirtazapine)                                                                                                                                                                                                                                                                  |
| S9  | SU(Nefazodone) OR AB(Nefazodone) OR TI(Nefazodone)                                                                                                                                                                                                                                                                     |
| S10 | SU(Paroxetine) OR AB(Paroxetine) OR TI(Paroxetine)                                                                                                                                                                                                                                                                     |
| S11 | SU(Sertraline) OR AB(Sertraline) OR TI(Sertraline)                                                                                                                                                                                                                                                                     |
| S12 | SU(Trazodone) OR AB(Trazodone) OR TI(Trazodone)                                                                                                                                                                                                                                                                        |
| S13 | SU(Venlafaxine) OR AB(Venlafaxine) OR TI(Venlafaxine)                                                                                                                                                                                                                                                                  |
| S14 | SU(vilazodone) OR AB(vilazodone) OR TI(vilazodone)                                                                                                                                                                                                                                                                     |
| S15 | SU(vortioxetine) OR AB(vortioxetine) OR TI(vortioxetine)                                                                                                                                                                                                                                                               |
| S16 | SU(duloxetine) OR AB(duloxetine) OR TI(duloxetine)                                                                                                                                                                                                                                                                     |
| S17 | SU(Antidepressive Drugs, Second-Generation) OR TI(antidepress*) OR AB(antidepress*)                                                                                                                                                                                                                                    |
| S18 | S1 OR S2 OR S3 OR S4 OR S5 OR S6 OR S7 OR S8 OR S9 OR S10 OR S11 OR S12 OR S13 OR S14 OR S15 OR S16 OR S17                                                                                                                                                                                                             |
| S19 | SU(depression) OR SU(depressive disorder) OR TI(depress*) OR AB(depress*)                                                                                                                                                                                                                                              |
| S20 | SU(randomized controlled trial) OR SU(randomized clinical trial) OR SU(random allocation) OR TI(random* AND control*) OR AB(random* AND control*) OR TI(random* AND placebo) OR AB(random* AND placebo)                                                                                                                |
| S21 | S18 AND S19 AND S20                                                                                                                                                                                                                                                                                                    |
| S22 | SU(adults) OR TI(adult*) OR AB(adult*)                                                                                                                                                                                                                                                                                 |
| S23 | S21 AND S22                                                                                                                                                                                                                                                                                                            |
| S24 | SU(exercise) OR TI(exercise) OR AB(exercise) OR SU(physical activity) OR TI(aerobic) OR AB(aerobic) OR TI(training) OR AB(training) OR TI(lift*) OR AB(lift*) OR SU(running) OR TI(running) OR AB(running) OR TI(jogging) OR AB(jogging) OR TI(walk*) OR AB(walk*) OR TI(swim*) OR AB(swim*) OR TI(cycl*) OR AB(cycl*) |
| S25 | S19 AND S20 AND S24                                                                                                                                                                                                                                                                                                    |
| S26 | S22 AND S25                                                                                                                                                                                                                                                                                                            |
| S27 | S23 AND S26                                                                                                                                                                                                                                                                                                            |
| S28 | #27 Limit date range 1990-2021 AND Limit language: English, Chinese, Italian                                                                                                                                                                                                                                           |

### Cochrane Library

| ID  | Search                                           |
|-----|--------------------------------------------------|
| #1  | bupropion:ti,ab,kw OR [mh bupropion]             |
| #2  | citalopram:ti,ab,kw OR [mh citalopram]           |
| #3  | escitalopram:ti,ab,kw OR [mh escitalopram]       |
| #4  | desvenlafaxine:ti,ab,kw OR [mh desvenlafaxine]   |
| #5  | duloxetine:ti,ab,kw OR [mh duloxetine]           |
| #6  | fluoxetine:ti,ab,kw OR [mh fluoxetine]           |
| #7  | fluvoxamine:ti,ab,kw OR [mh fluvoxamine]         |
| #8  | Levomilnacipran:ti,ab,kw OR [mh levomilnacipran] |
| #9  | mirtazapine:ti,ab,kw OR [mh mirtazapine]         |
| #10 | nefazodone:ti,ab,kw OR [mh nefazodone]           |
| #11 | Paroxetine:ti,ab,kw OR [mh paroxetine]           |
| #12 | sertraline:ti,ab,kw OR [mh sertraline]           |
| #13 | Trazodone:ti,ab,kw OR [mh trazodone]             |
| #14 | venlafaxine:ti,ab OR [mh venlafaxine]            |
| #15 | vilazodone:ti,ab,kw OR [mh vilazodone]           |
| #16 | vortioxetine:ti,ab,kw OR [mh duloxetine]         |

|     |                                                                                                                                                                                                                         |
|-----|-------------------------------------------------------------------------------------------------------------------------------------------------------------------------------------------------------------------------|
| #17 | [mh Antidepressive Agents, Second-Generation] OR antidepress*.ti,ab,kw                                                                                                                                                  |
| #18 | #1 OR #2 OR #3 OR #4 OR #5 OR #6 OR #7 OR #8 OR #9 OR #10 OR #11 OR #12 OR #13 OR #14 OR #15 OR #16 OR #17                                                                                                              |
| #19 | [mh Depression] OR [mh Depressive Disorder, Major] OR depress*.ti,ab,kw                                                                                                                                                 |
| #20 | [mh Randomized Controlled Trials as Topic] OR [mh Randomized Controlled Trial] OR [mh Random Allocation] OR ("randomized controlled"):ti,ab,kw OR ("controlled clinical"):ti,ab,kw                                      |
| #21 | #18 AND #19 AND #20                                                                                                                                                                                                     |
| #22 | [mh Adults] OR adults:ti,ab,kw                                                                                                                                                                                          |
| #23 | #21 AND #22                                                                                                                                                                                                             |
| #24 | [mh Exercise] OR [mh "physical activity"] OR exercise:ti,ab,kw OR training:ti,ab,kw OR lift*:ti,ab,kw OR aerobic:ti,ab,kw OR running:ti,ab,kw OR walk*:ti,ab,kw OR jogging:ti,ab,kw OR swim*:ti,ab,kw OR cycl*:ti,ab,kw |
| #25 | #19 AND #20 AND #24                                                                                                                                                                                                     |
| #26 | #25 AND #22                                                                                                                                                                                                             |
| #27 | #23 OR #26 with Publication Year from 1990 to 2021 AND language: English, Chinese, Italian                                                                                                                              |

### Embase

| #  | Searches                                                                                                                                                                  |
|----|---------------------------------------------------------------------------------------------------------------------------------------------------------------------------|
| 1  | exp bupropion/ or bupropion.tn,ab,ti. or 34911 55 2.rn.                                                                                                                   |
| 2  | exp citalopram/ or citalopram.tn,ab,ti. or 59729 33 .rn.                                                                                                                  |
| 3  | exp escitalopram/ or escitalopram.tn,ab,ti. or 128196 01 0.rn.                                                                                                            |
| 4  | exp desvenlafaxine/ or desvenlafaxine.tn,ab,ti. or 93413 62 8.rn.                                                                                                         |
| 5  | exp fluoxetine/ or fluoxetine.tn,ab,ti. or 54910 89 3.rn.                                                                                                                 |
| 6  | exp fluvoxamine/ or fluvoxamine.tn,ab,ti. or 54739 18 3.rn.                                                                                                               |
| 7  | exp milnacipran/ or levomilnacipran.tn,ab,ti. or 96847 54 0.rn.                                                                                                           |
| 8  | exp mirtazapine/ or mirtazapine.tn,ab,ti. or 85650 52 8.rn.                                                                                                               |
| 9  | exp nefazodone/ or nefazodone.tn,ab,ti. or 82752 99 6.rn.                                                                                                                 |
| 10 | exp paroxetine/ or paroxetine.tn,ab,ti. or 61869 08 7.rn.                                                                                                                 |
| 11 | exp sertraline/ or sertraline.tn,ab,ti. or 79617 96 2.rn.                                                                                                                 |
| 12 | exp trazodone/ or trazodone.tn,ab,ti. or 19794 93 5.rn.                                                                                                                   |
| 13 | exp venlafaxine/ or venlafaxine.tn,ab,ti. or 93413 69 5.rn.                                                                                                               |
| 14 | exp vilazodone/ or vilazodone.tn,ab,ti. or 163521 12 8.rn.                                                                                                                |
| 15 | exp vortioxetine/ or vortioxetine.tn,ab,ti. or 508233 74 7.rn.                                                                                                            |
| 16 | exp duloxetine/ or duloxetine.tn,ab,ti. or 116539 59 4.rn.                                                                                                                |
| 17 | exp antidepressant agent/ or antidepress*.ti,ab.                                                                                                                          |
| 18 | 1 or 2 or 3 or 4 or 5 or 6 or 7 or 8 or 9 or 10 or 11 or 12 or 13 or 14 or 15 or 16 or 17                                                                                 |
| 19 | exp depression/ or exp major depression/ or depress*.ab,ti,kw.                                                                                                            |
| 20 | exp randomized controlled trial/ or randomized controlled trial.ab,ti,pt. or randomized placebo trial.ti,ab. or exp randomization/                                        |
| 21 | 18 and 19 and 20                                                                                                                                                          |
| 22 | exp exercise/ or exercise.ti,ab. or aerobic.ti,ab. or training.ti,ab. or lift*.ti,ab. or running.ti,ab. or jogging.ti,ab. or walk*.ti,ab. or swim*.ti,ab. or cycl*.ti,ab. |
| 23 | 19 and 20 and 22                                                                                                                                                          |
| 24 | exp adults/ or adult*.ti,ab.                                                                                                                                              |
| 25 | 21 and 24                                                                                                                                                                 |
| 26 | 23 and 24                                                                                                                                                                 |
| 27 | 25 or 26                                                                                                                                                                  |
| 28 | Limit 27 to yr=1990-Current, English, Chinese, Italian language                                                                                                           |

### Scopus

| #  | Query                                                                                                                                               |
|----|-----------------------------------------------------------------------------------------------------------------------------------------------------|
| #1 | TITLE-ABS-KEY(bupropion OR citalopram OR escitalopram OR desvenlafaxine OR fluoxetine OR fluvoxamine OR milnacipran OR mirtazapine OR nefazodone OR |

|    |                                                                                                                                 |
|----|---------------------------------------------------------------------------------------------------------------------------------|
|    | paroxetine OR sertraline OR trazodone OR venlafaxine OR vilazodone OR vortioxetine OR duloxetine OR antidepress*)               |
| #2 | TITLE-ABS-KEY(depress*)                                                                                                         |
| #3 | TITLE-ABS-KEY(randomized controlled trial)                                                                                      |
| #4 | TITLE-ABS-KEY(adult*)                                                                                                           |
| #5 | #1 AND #2 AND #3 AND #4                                                                                                         |
| #6 | TITLE-ABS-KEY(exercise OR 'physical activity' OR aerobic OR training OR lift* OR running OR walk* OR jogging OR swim* OR cycl*) |
| #7 | #2 AND #3 AND #4 AND #6                                                                                                         |
| #8 | #5 OR #7                                                                                                                        |

### SportDiscus

| Search | Query                                                                                                                                                                                                                                                                                                                                                                                                                                                                                                                                                                                                                                                                                                                                                                                        |
|--------|----------------------------------------------------------------------------------------------------------------------------------------------------------------------------------------------------------------------------------------------------------------------------------------------------------------------------------------------------------------------------------------------------------------------------------------------------------------------------------------------------------------------------------------------------------------------------------------------------------------------------------------------------------------------------------------------------------------------------------------------------------------------------------------------|
| S1     | (TI(bupropion OR citalopram OR escitalopram OR desvenlafaxine OR fluoxetine OR fluvoxamine OR milnacipran OR mirtazapine OR nefazodone OR paroxetine OR sertraline OR trazodone OR venlafaxine OR vilazodone OR vortioxetine OR duloxetine OR antidepress*)) OR (AB(bupropion OR citalopram OR escitalopram OR desvenlafaxine OR fluoxetine OR fluvoxamine OR milnacipran OR mirtazapine OR nefazodone OR paroxetine OR sertraline OR trazodone OR venlafaxine OR vilazodone OR vortioxetine OR duloxetine OR antidepress*)) OR (SU(bupropion OR citalopram OR escitalopram OR desvenlafaxine OR fluoxetine OR fluvoxamine OR milnacipran OR mirtazapine OR nefazodone OR paroxetine OR sertraline OR trazodone OR venlafaxine OR vilazodone OR vortioxetine OR duloxetine OR antidepress*)) |
| S2     | SU(depression or depressive disorder or depressive symptoms or major depressive disorder) OR TI depress* OR AB depress*                                                                                                                                                                                                                                                                                                                                                                                                                                                                                                                                                                                                                                                                      |
| S3     | SU(randomized controlled trials or rtc or randomised control trials) OR TI(random* AND control*) OR AB (random* AND control*)                                                                                                                                                                                                                                                                                                                                                                                                                                                                                                                                                                                                                                                                |
| S4     | SU(adults or adult) OR TI adult* OR AB adult*                                                                                                                                                                                                                                                                                                                                                                                                                                                                                                                                                                                                                                                                                                                                                |
| S5     | S1 AND S2 AND S3 AND S4                                                                                                                                                                                                                                                                                                                                                                                                                                                                                                                                                                                                                                                                                                                                                                      |
| S6     | SU(exercise or physical activity) OR TI(exercise OR 'physical activity' OR aerobic OR training OR lift* OR running OR walk* OR jogging OR swim* OR cycl*) OR AB(exercise OR 'physical activity' OR aerobic OR training OR lift* OR running OR walk* OR jogging OR swim* OR cycl*)                                                                                                                                                                                                                                                                                                                                                                                                                                                                                                            |
| S7     | S2 AND S3 AND S4 AND S6                                                                                                                                                                                                                                                                                                                                                                                                                                                                                                                                                                                                                                                                                                                                                                      |
| S8     | S5 OR S7                                                                                                                                                                                                                                                                                                                                                                                                                                                                                                                                                                                                                                                                                                                                                                                     |

### Web of Science

| #  | Query                                                                                                                                                                                                                                                       |
|----|-------------------------------------------------------------------------------------------------------------------------------------------------------------------------------------------------------------------------------------------------------------|
| #1 | TS=(bupropion OR citalopram OR escitalopram OR desvenlafaxine OR fluoxetine OR fluvoxamine OR milnacipran OR mirtazapine OR nefazodone OR paroxetine OR sertraline OR trazodone OR venlafaxine OR vilazodone OR vortioxetine OR duloxetine OR antidepress*) |
| #2 | TS=(depress*)                                                                                                                                                                                                                                               |
| #3 | TS=(random* AND (control* OR placebo))                                                                                                                                                                                                                      |
| #4 | TS=(adult*)                                                                                                                                                                                                                                                 |
| #5 | TS=(exercise OR 'physical activity' OR aerobic OR training OR lift* OR running OR walk* OR jogging OR swim* OR cycl*)                                                                                                                                       |
| #6 | #1 AND #2 AND #3 AND #4                                                                                                                                                                                                                                     |
| #7 | #2 AND #3 AND #4 AND #5                                                                                                                                                                                                                                     |
| #8 | #6 OR #7                                                                                                                                                                                                                                                    |



## eAppendix 2. Additional methodology information

### Risk of bias

The Cochrane risk of bias assessment tool (RoB-2) was used to determine the quality of the individual studies.<sup>1</sup> Bias was assessed in the following domains: 1) randomization process, 2) deviations from the intended interventions, 3) missing outcome data, 4) measurement of the outcome, and 5) selection of the reported results. Each domain was assessed as having either low risk of bias, some concerns, or high risk of bias.

To implement RoB-2, we utilized the Excel template provided in the “Cochrane Handbook for Systematic Reviews of Interventions”,<sup>2</sup> which includes “signalling questions” that can be used to assess bias in each domain. Each domain is automatically evaluated by an algorithm based on the signalling questions, as well as subjectively by the author. To avoid the influence of personal bias, the assessment of each domain was strictly based on the output of the algorithm.

1. Bias due to the randomization process was rated “low” if the study allocation sequence was reported as random and there was evidence that the allocation sequence was concealed. Allocation concealment was considered adequate if the allocation was carried out by investigators that were external to the project, or if authors used a form of remote or centrally administered method that ensured allocation concealment (e.g., sealed opaque envelopes). If the strategy for allocation concealment was not clearly reported, the domain was rated as having “some concerns”. If both categories were deemed to be inadequately described, the domain was rated “high”.
2. Bias due to deviations from the intended interventions was based on whether participants and/or study personnel were blinded to participants’ assigned intervention, whether there were deviations from the intervention due to the trial context, and whether an appropriate analysis was used to estimate the effect of the intervention. Bias was rated “low” if all categories were rated as low. Following the Cochrane algorithm, if participants or study personnel were aware of participants’ allocated intervention but all other categories were considered as low, the domain was still rated as “low”. If there were deviations from the interventions that were suspected to affect the outcome, and if these were not balanced between groups, or if an inappropriate statistical analysis was used that was suspected to substantially impact the outcome, the domain was rated “high”. Any other combination was rated as having “some concerns”.
3. Bias due to missing outcome data was rated “low” if data were available for all, or nearly all, participants randomized. If there was the possibility that missingness in the outcome was influenced by its true value, the domain was rated “some concerns”. If missingness in the outcome was likely influenced by its true value, the domain was rated “high”.
4. Bias in measurement of the outcome was rated “high” if the method for measuring the outcome was inappropriate, if it differed between groups, or if it was likely that the assessment was influenced by knowledge of the intervention. It was rated “some concerns” if outcome assessors were aware of the intervention received by participants, but it was not likely that assignment was influenced by knowledge of the intervention. Bias in measurement of the outcome was rated “low” if all categories were considered as low.
5. Bias in selection of the reported result was rated “low” if it was unlikely that the results were selected from multiple measurements or analyses, and data were analysed in accordance with a pre-specified plan. If no pre-specified plan was available but it was unlikely that results were selected from multiple measurements or analyses, the domain was rated “some concerns”. If it was suspected that results were selected from multiple measurements or analyses, the domain was rated “high”.

Overall risk of bias was rated “low” if all domains were rated “low”, it was rated “some concerns” if the study was judged to raise some concerns in at least one domain, but not to be at high risk of bias for any domain, and it was rated “high” if at least one domain was considered as “high”.

### Confidence of Network Meta-analysis (CINeMA) rating

We used the CINeMA framework to assess the overall credibility of the results.<sup>3</sup> CINeMA is based on the following domains: 1) within-study bias, 2) reporting bias, 3) indirectness, 4) imprecision, 5) heterogeneity, and 6) incoherence. Within-study bias was evaluated using the RoB-2 tool. Reporting bias for each comparison was coded as “suspected” or “undetected” based on the completeness of the research and availability of published data. Indirectness was assessed as described below. To assess imprecision, heterogeneity, and incoherence, we set the clinically significant effect size to 0.35.<sup>4</sup>

### Indirectness

Indirectness was assessed based on recommended guidelines.<sup>5</sup> We evaluated whether studies differed in relation to 1) population, 2) intervention, 3) outcome, and 4) whether a study showed direct evidence for at least one comparison of interest. Study indirectness was coded as “low” if three or more outcomes were considered to be “low” and no more than one was “unclear”, and coded as “high” if two or more outcomes were considered to be “high”, whereas any other combination was coded as “moderate”.

1. Sterne JAC, Savović J, Page MJ, et al. RoB 2: a revised tool for assessing risk of bias in randomised trials. *BMJ*. 2019;366:l4898.
2. Higgins JPT, Savović J, Page MJ, Elbers RG, Sterne JAC. Chapter 8: Assessing risk of bias in a randomized trial. In: Higgins JPT, Thomas J, Chandler J, Cumpston M, Li T, Page MJ, Welch VA (editors). *Cochrane Handbook for Systematic Reviews of Interventions* version 6.3 (updated February 2022). Cochrane, 2022. Available from [www.training.cochrane.org/handbook](http://www.training.cochrane.org/handbook).
3. Nikolakopoulou A, Higgins JPT, Papakonstantinou T, et al. CINeMA: An approach for assessing confidence in the results of a network meta-analysis. *PLOS Medicine*. 2020;17(4):e1003082.
4. Kroenke K, Stump TE, Chen CX, et al. Minimally important differences and severity thresholds are estimated for the PROMIS depression scales from three randomized clinical trials. *Journal of affective disorders*. 2020;266:100-108. doi:10.1016/j.jad.2020.01.101
5. Guyatt GH, Oxman AD, Kunz R, et al. GRADE guidelines: 8. Rating the quality of evidence—indirectness. *Journal of Clinical Epidemiology*. 2011;64(12):1303-1310.

### eAppendix 3. Pairwise meta-analyses

#### Comparative effectiveness on depressive symptoms from pairwise meta-analyses

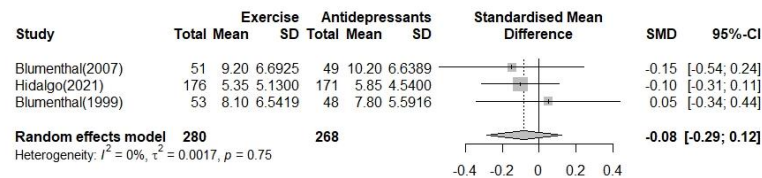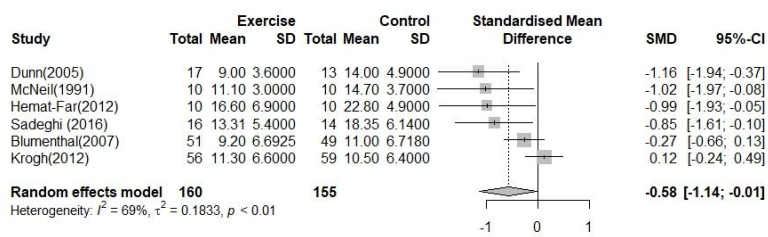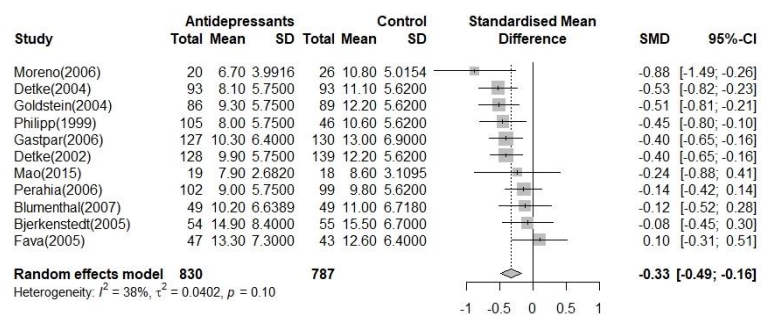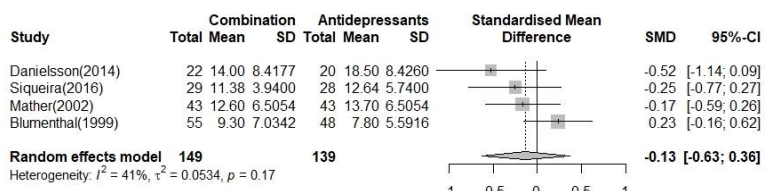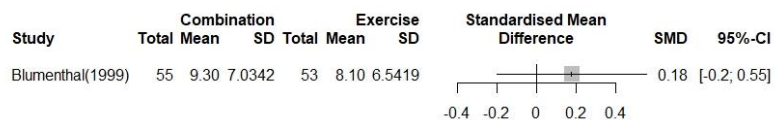

**Comparative effectiveness on acceptability from pairwise meta-analyses**

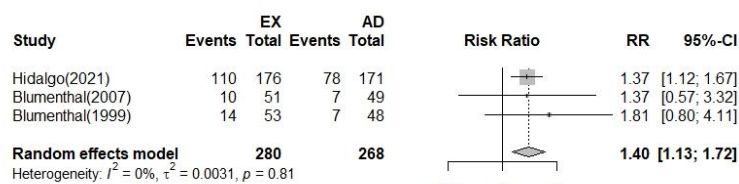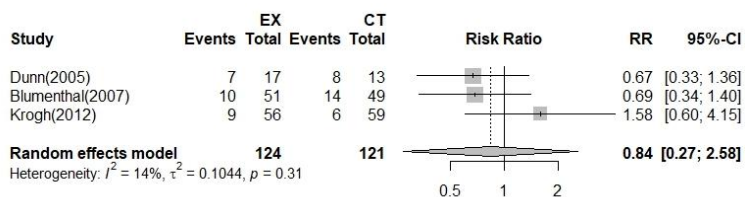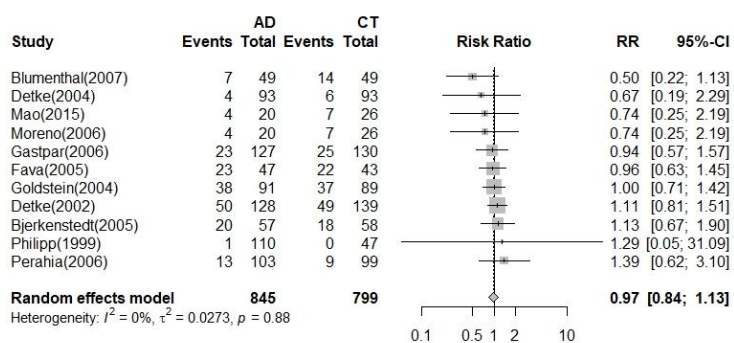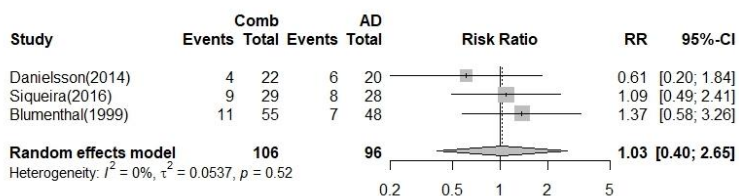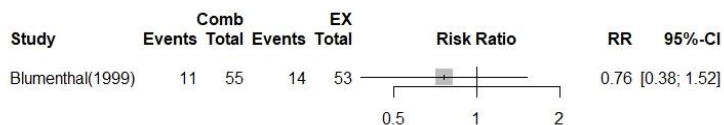

#### eAppendix 4. References

Bjerkenstedt L, Edman GV, Alken RG, Mannel M. Hypericum extract LI 160 and fluoxetine in mild to moderate depression: a randomized, placebo-controlled multi-center study in outpatients. *European archives of psychiatry and clinical neuroscience*. Feb 2005;255(1):40-7. doi:10.1007/s00406-004-0532-z

Blumenthal J, Babyak M, Moore K, et al. Effects of Exercise Training on Older Patients With Major Depression. *Archives of internal medicine*. 10/01 1999;159:2349-56. doi:10.1001/archinte.159.19.2349

Blumenthal JA, Babyak MA, Doraiswamy PM, et al. Exercise and pharmacotherapy in the treatment of major depressive disorder. *Psychosom Med*. Sep-Oct 2007;69(7):587-96. doi:10.1097/PSY.0b013e318148c19a

Danielsson L, Papoulias I, Petersson EL, Carlsson J, Waern M. Exercise or basic body awareness therapy as add-on treatment for major depression: a controlled study. *Journal of affective disorders*. Oct 2014;168:98-106. doi:10.1016/j.jad.2014.06.049

Detke MJ, Lu Y, Goldstein DJ, McNamara RK, Demitrack MA. Duloxetine 60 mg once daily dosing versus placebo in the acute treatment of major depression. *Journal of psychiatric research*. Nov-Dec 2002;36(6):383-90. doi:10.1016/s0022-3956(02)00060-2

Detke MJ, Wiltse CG, Mallinckrodt CH, McNamara RK, Demitrack MA, Bitter I. Duloxetine in the acute and long-term treatment of major depressive disorder: a placebo- and paroxetine-controlled trial. *European neuropsychopharmacology : the journal of the European College of Neuropsychopharmacology*. Dec 2004;14(6):457-70. doi:10.1016/j.euroneuro.2004.01.002

Dunn AL, Trivedi MH, Kampert JB, Clark CG, Chambless HO. Exercise treatment for depression: Efficacy and dose response. *American journal of preventive medicine*. January 2005;28(1):1-8

Fava M, Alpert J, Nierenberg AA, et al. A Double-blind, randomized trial of St John's wort, fluoxetine, and placebo in major depressive disorder. *Journal of clinical psychopharmacology*. Oct 2005;25(5):441-7. doi:10.1097/01.jcp.0000178416.60426.29

Gastpar M, Singer A, Zeller K. Comparative efficacy and safety of a once-daily dosage of hypericum extract STW3-VI and citalopram in patients with moderate depression: A double-blind, randomised, multicentre, placebo-controlled study. *Pharmacopsychiatry*. March 2006;39(2):66-75

Goldstein DJ, Lu Y, Detke MJ, Wiltse C, Mallinckrodt C, Demitrack MA. Duloxetine in the treatment of depression: a double-blind placebo-controlled comparison with paroxetine. *Journal of clinical psychopharmacology*. Aug 2004;24(4):389-99. doi:10.1097/01.jcp.0000132448.65972.d9

Hemat-Far A, Shahsavari A, Mousavi SR. Effects of selected aerobic exercises on the depression and concentrations of plasma serotonin in the depressed female students aged 18 to 25. *Journal of Applied Research*. 2012;12(1):47-52

Hidalgo JL-T, Sotos JR, Group D-E. Effectiveness of Physical Exercise in Older Adults With Mild to Moderate Depression. *The Annals of Family Medicine*. 2021;19(4):302-309. doi:10.1370/afm.2670

Krogh J, Videbech P, Thomsen C, Gluud C, Nordentoft M. DEMO-II Trial. Aerobic Exercise versus Stretching Exercise in Patients with Major Depression-A Randomised Clinical Trial. *PLoS One*. 31 Oct 2012;7 (10) (e48316)

Mao JJ, Xie SX, Zee J, et al. Rhodiola rosea versus sertraline for major depressive disorder: A randomized placebo-controlled trial. *Phytomedicine : international journal of phytotherapy and phytopharmacology*. Mar 15 2015;22(3):394-9. doi:10.1016/j.phymed.2015.01.010

Mather AS, Rodriguez C, Guthrie MF, McHarg AM, Reid IC, McMurdo MET. Effects of exercise on depressive symptoms in older adults with poorly responsive depressive disorder. *British Journal of Psychiatry*. 2002;180(MAY):411-415

McNeil JK, LeBlanc EM, Joyner M. The effect of exercise on depressive symptoms in the moderately depressed elderly. *Psychology and aging*. Sep 1991;6(3):487-8. doi:10.1037//0882-7974.6.3.487

Moreno RA, Teng CT, Almeida KM, Tavares Junior H. Hypericum perforatum versus fluoxetine in the treatment of mild to moderate depression: a randomized double-blind trial in a Brazilian sample. *Revista brasileira de psiquiatria (Sao Paulo, Brazil : 1999)*. Mar 2006;28(1):29-32. doi:10.1590/s1516-44462006000100007

Perahia DG, Wang F, Mallinckrodt CH, Walker DJ, Detke MJ. Duloxetine in the treatment of major depressive disorder: a placebo- and paroxetine-controlled trial. *European psychiatry : the journal of the Association of European Psychiatrists*. Sep 2006;21(6):367-78. doi:10.1016/j.eurpsy.2006.03.004

Philipp M, Kohnen R, Hiller KO. Hypericum extract versus imipramine or placebo in patients with moderate depression: Randomised multicentre study of treatment for eight weeks. *British Medical Journal*. 11 Dec 1999;319(7224):1534-1538

Sadeghi K, Ahmadi SM, Ahmadi SM, et al. A Comparative Study of the Efficacy of Cognitive Group Therapy and Aerobic Exercise in the Treatment of Depression among the Students. *Global journal of health science*. Oct 1 2016;8(10):54171. doi:10.5539/gjhs.v8n10p1

Siqueira CC, Valiengo LL, Carvalho AF, et al. Antidepressant Efficacy of Adjunctive Aerobic Activity and Associated Biomarkers in Major Depression: A 4-Week, Randomized, Single-Blind, Controlled Clinical Trial. *PLoS One*. 2016;11(5):e0154195 doi:10.1371/journal.pone.0154195
